# Supplementary material
Source: Springer Nature journal article supplement (https://www.springermedizin.de/resource/supplementary/13052_2014_369_MOESM1_ESM.pdf/9671986)

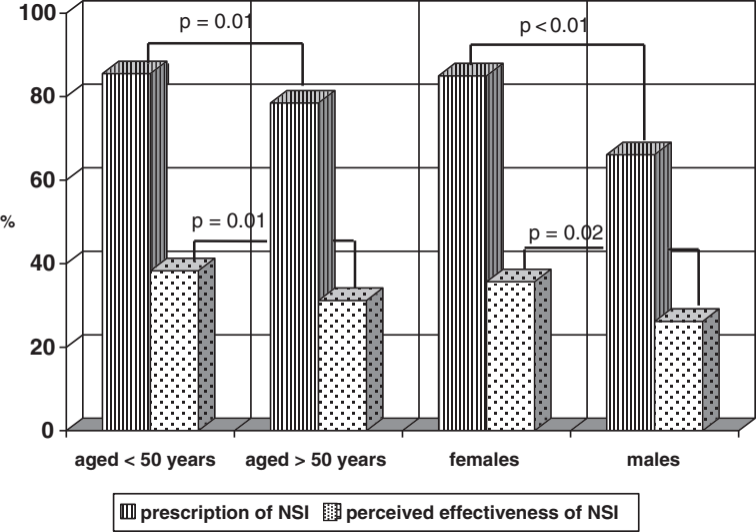

Supplement: MOESM1 [file 9671986]
